# Supplementary material for: Dynamic CCN3 expression in the murine CNS does not confer essential roles in myelination or remyelination
Source: PubMed Central journal article supplement (PMC7395501; doi:10.1073/pnas.1922089117), 2020-07-10
Supplement: pnas.1922089117.sapp.pdf [file pnas.1922089117.sapp.pdf]

Supplementary Information for:

**Dynamic CCN3 expression in the murine CNS does not confer essential roles in myelination or remyelination**

Nira de la Vega Gallardo<sup>1</sup>, Rosana Penalva<sup>1</sup>, Marie Dittmer<sup>1</sup>, Michelle Naughton<sup>1</sup>, John Falconer<sup>1</sup>, Jill Moffat<sup>1</sup>, Alerie G. de la Fuente<sup>1</sup>, José Romero Hombrebueno<sup>2</sup>, Zhiyong Lin<sup>3</sup>, Bernard Perbal<sup>4</sup>, Rebecca J. Ingram<sup>1</sup>, Emma Evergren<sup>5</sup> and Denise C. Fitzgerald<sup>1\*</sup>

\*Corresponding author: Denise C. Fitzgerald, [d.fitzgerald@qub.ac.uk](mailto:d.fitzgerald@qub.ac.uk)

**This PDF file includes:**

Figures S1 to S4  
Table S1  
Legends for Figures S1 to S4

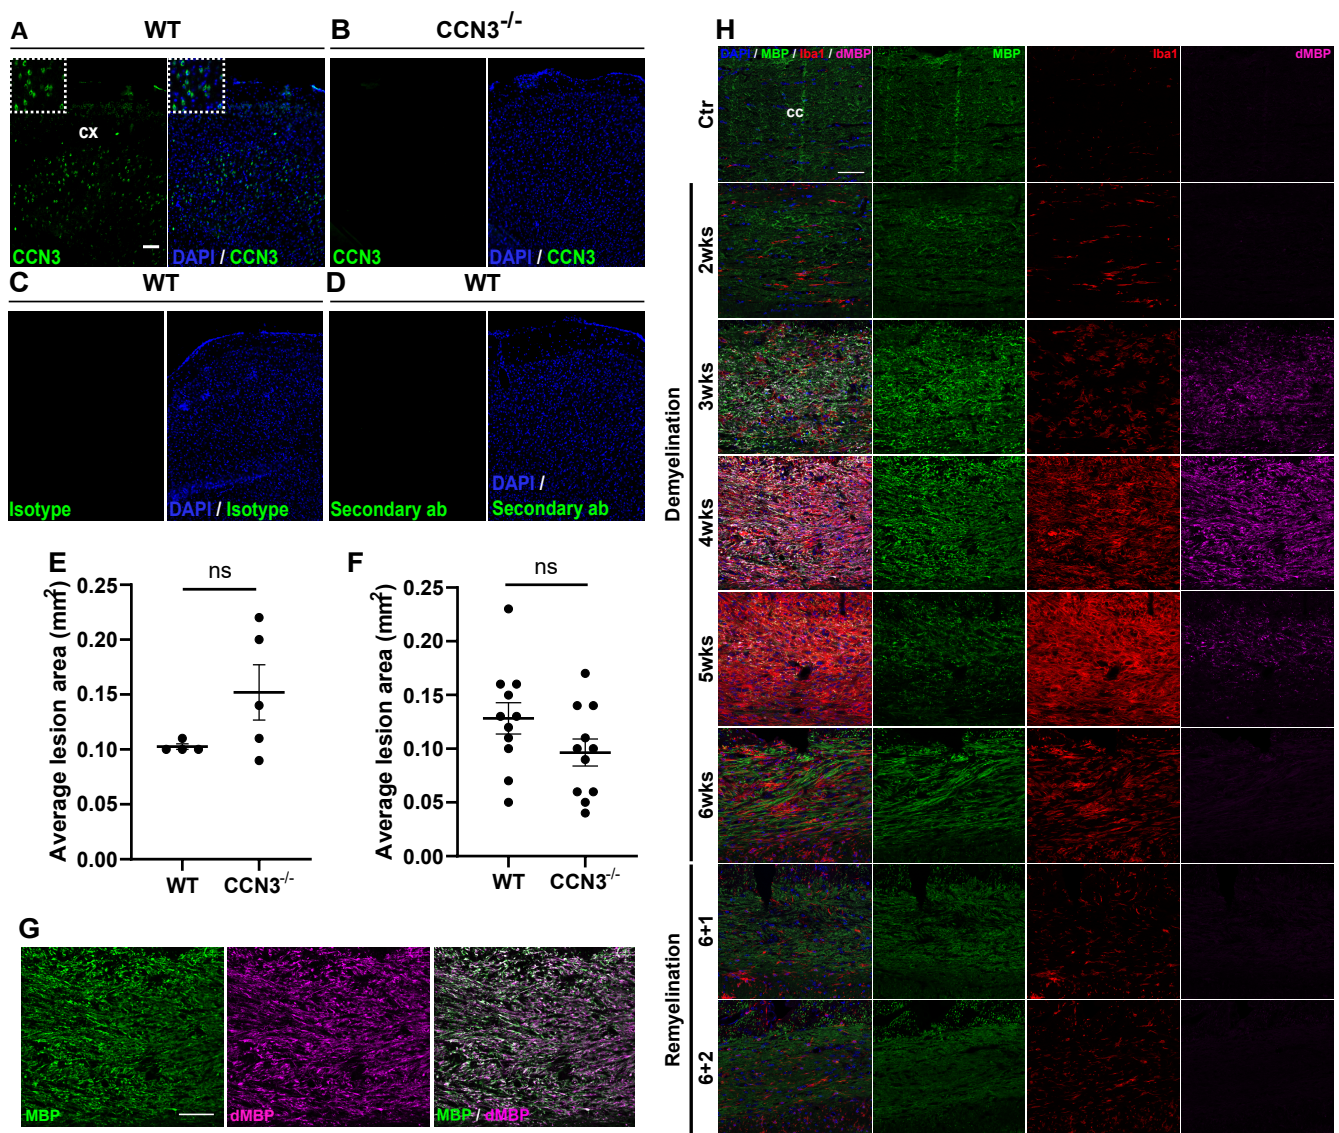

**Supplementary Figure 1. Validation of staining and *in vivo* models of demyelination.** (A) Staining of CCN3 in WT brain tissue. (B) Staining of CCN3 in CCN3<sup>-/-</sup> brain tissue. (C) Staining of isotype control of polyclonal goat IgG anti-murine CCN3 antibody in WT brain tissue. (D) Staining with secondary antibody control used to detect goat anti-murine CCN3 in WT brain tissue; no primary antibody used. cx: cerebral cortex. Quantification of average lysolecithin-induced lesion area analysed at (E) 5 dpl and (F) 14 dpl. (G) Representative confocal images of MBP and dMBP staining in the corpus callosum 4 weeks after cuprizone-induced demyelination. (H) Representative confocal images of MBP, dMBP and Iba1 staining in the corpus callosum of cuprizone-fed mice and controls. cc: corpus callosum. Scale bars: (A-D) 100  $\mu$ m and (G-H) 50  $\mu$ m. Data are mean  $\pm$  SEM. ns: not significant. Statistical analysis: (E) Mann-Whitney U tests or (F) unpaired, two-tailed, student's t test. n = (E) 4 - 5 and (F) 11 animals per group.

**A****CCN3**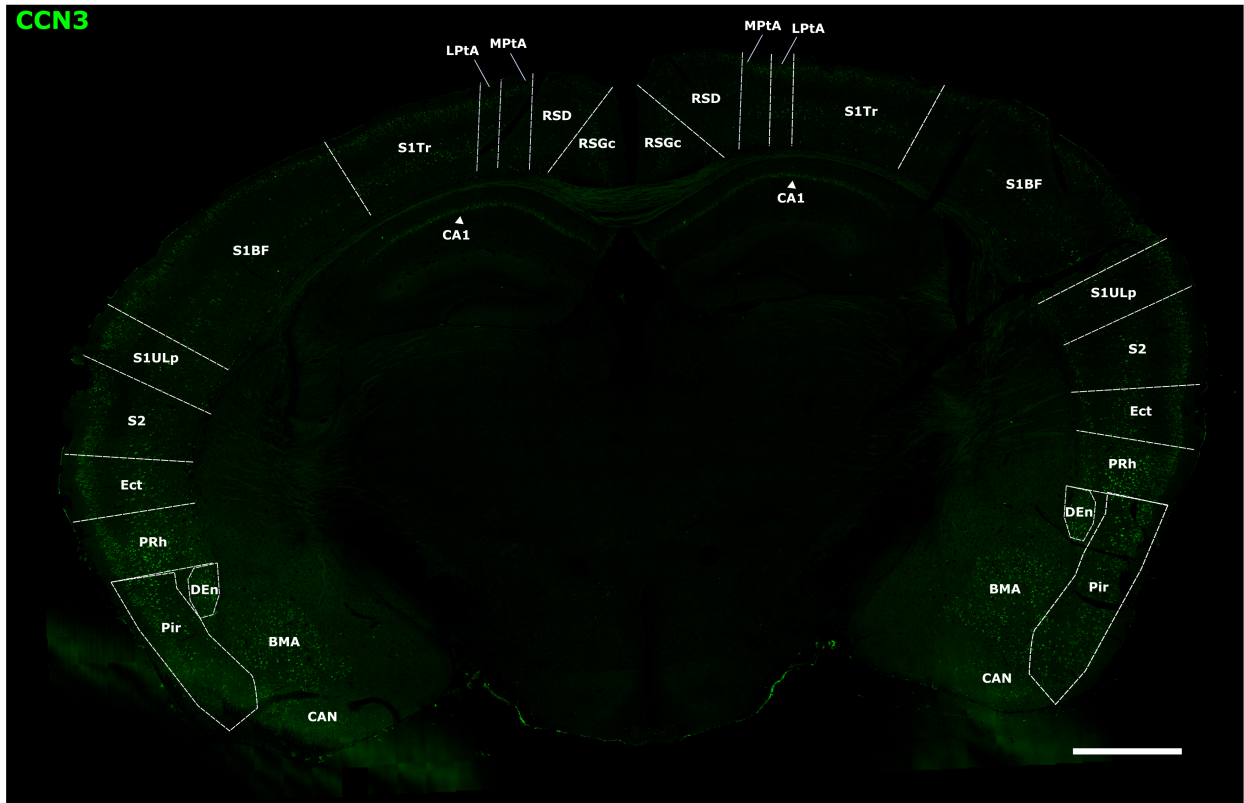**B****CCN3 / NeuN**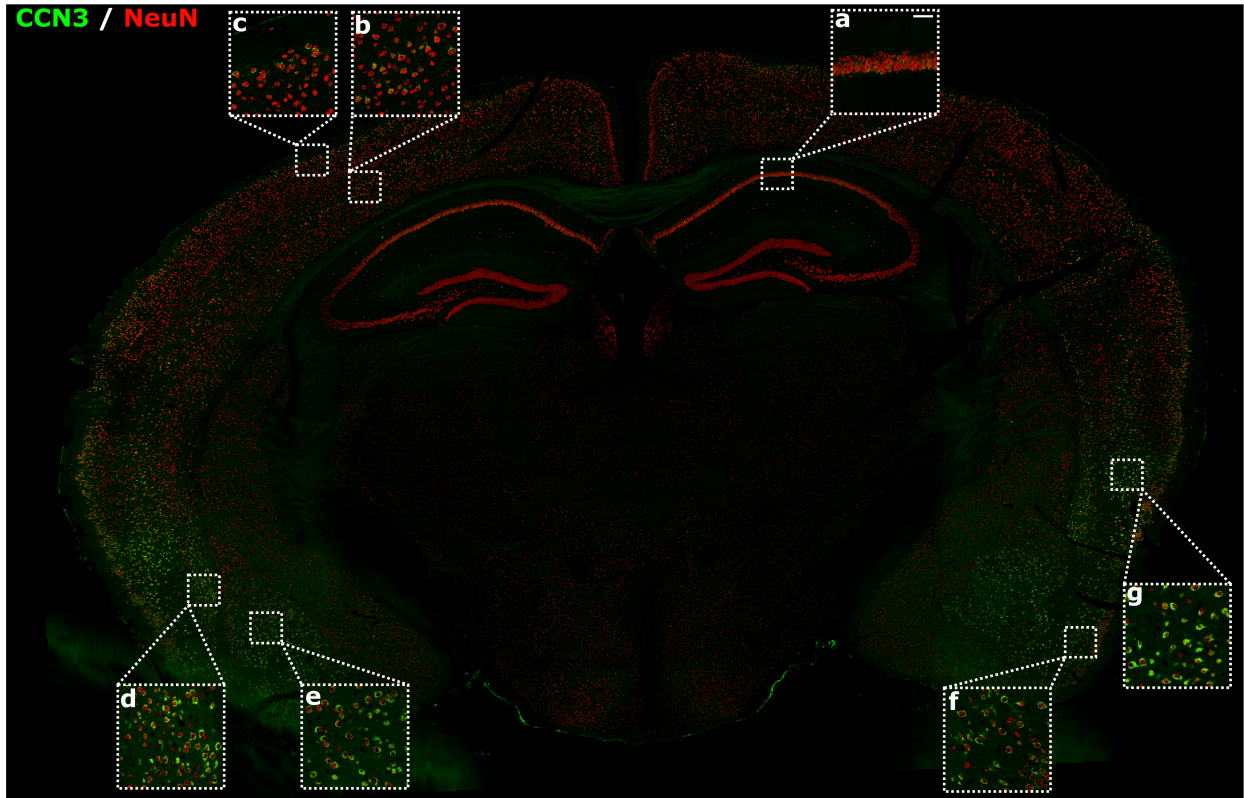

**Supplementary Figure 2. CCN3 is predominantly expressed in layers 2/3 and 5 of all murine cerebral cortex anatomical regions.** (A) Representative confocal stitched image of CCN3 expression in a murine coronal brain section -1.60 mm from Bregma. (B) Magnified images of CCN3 and NeuN staining in (a) hippocampal CA1 field (b) cerebral cortex layer 5 (c) cerebral cortex layer 2/3 (d) dorsal endopiriform nuclei (e) basomedial amygdala nuclei (f) piriform cortex and (g) perirhinal cortex. Scale bars are (A,B) 1 mm and (Ba-Bg) 50  $\mu$ m. CAN: cortical amygdala nuclei, BMA: basomedial amygdala nuclei, Pir: piriform cortex, DEn: dorsal endopiriform nuclei, PRh: perirhinal cortex, Ect: ectorhinal cortex, S2: secondary somatosensory cortex, S1ULp: primary somatosensory cortex (upper lip), S1BF: primary somatosensory cortex (barrel field), S1Tr: primary somatosensory cortex (trunk), LPtA: lateral parietal association cortex, MPtA: medial parietal association cortex, RSD: retrosplenial dysgranular cortex, RSGc: retrosplenial granular cortex c, CA1: subfield 1 of hippocampus.

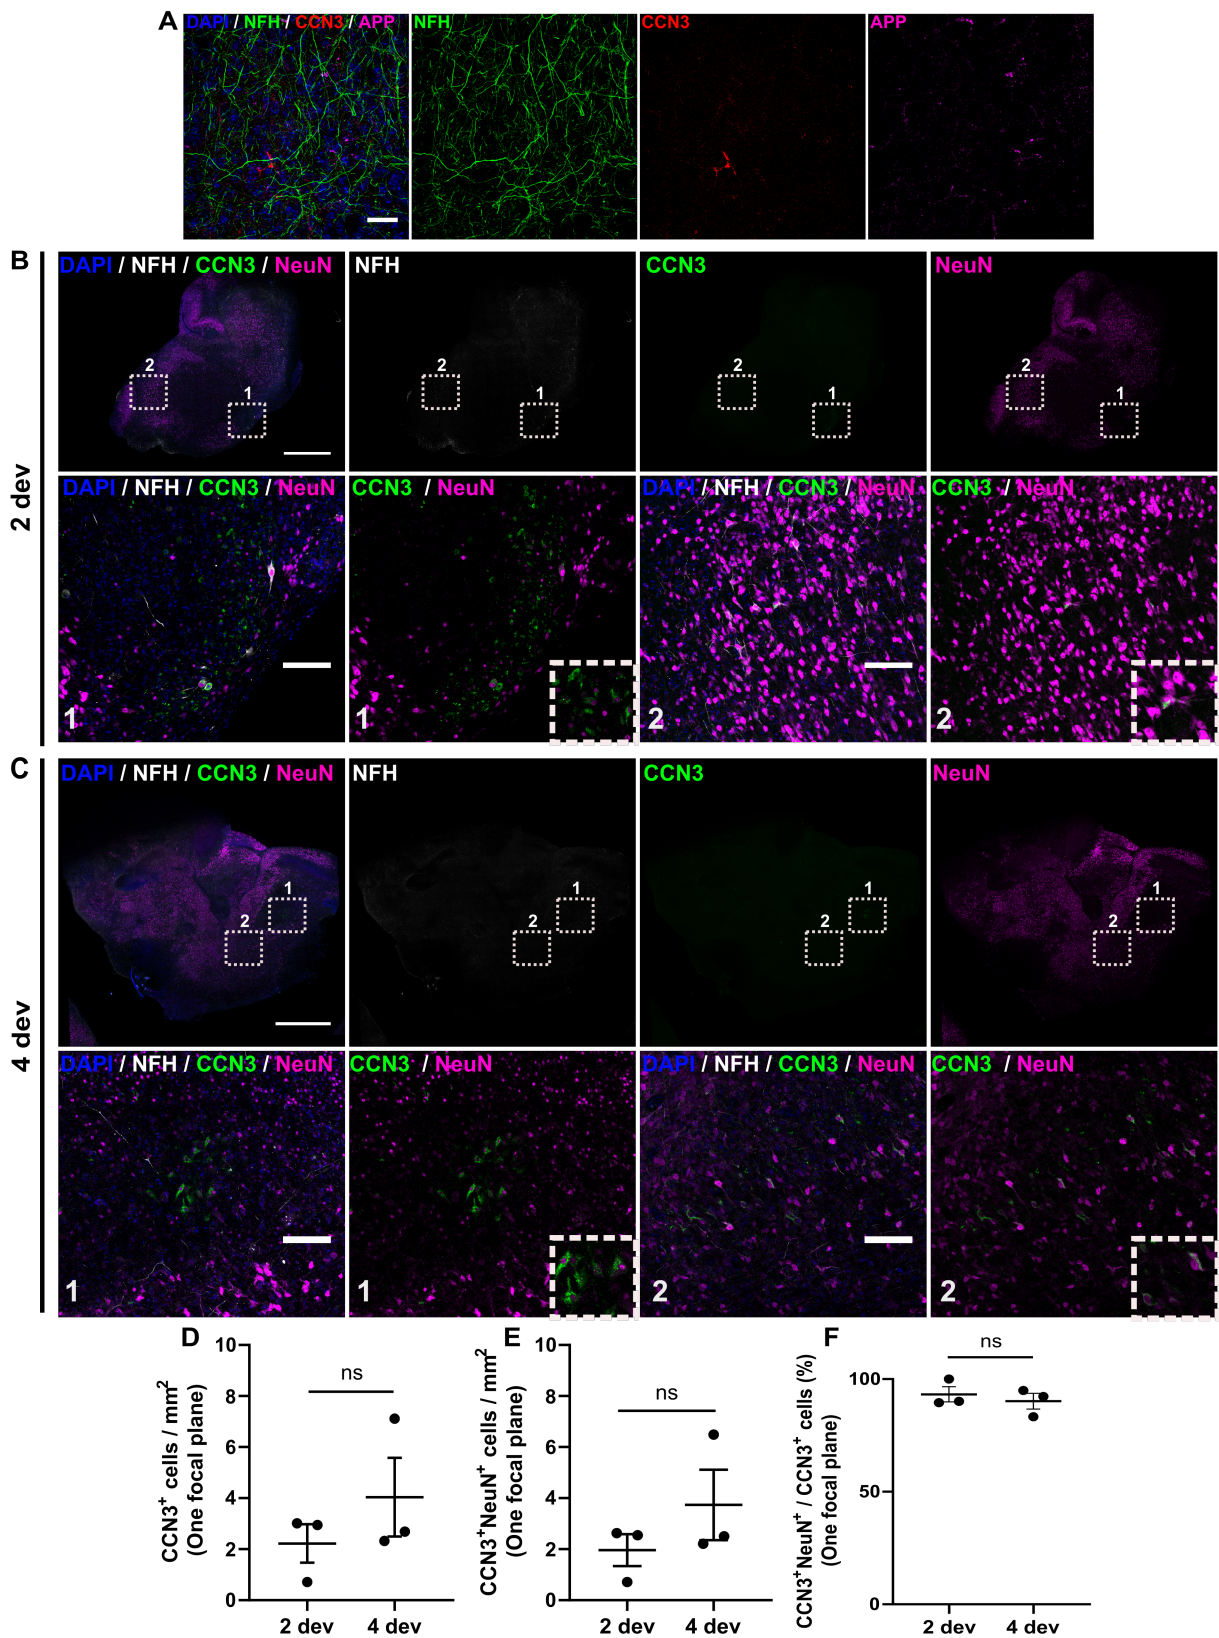

**Supplementary Figure 3. CCN3 is expressed in neurons of cerebellar/brain stem slices *ex vivo*.** (A) Representative confocal images of NFH, CCN3 and APP staining in brain slices at 4 days *ex vivo* (dev). Representative confocal images of NFH, CCN3 and NeuN staining in one focal plane of cerebellar/brain stem slices at (B) 2 and (C) 4 dev. (D) CCN3<sup>+</sup> cells, (E) CCN3<sup>+</sup>NeuN<sup>+</sup> cells and (F) percentage of CCN3<sup>+</sup>NeuN<sup>+</sup> cell quantification in one focal plane of 2 and 4 dev cerebellar/brain stem slices. Scale bars are (B-C) 1 mm, (B1,B2,C1,C2) 100  $\mu$ m and (A) 25 $\mu$ m. Data are mean  $\pm$  SEM. ns: not significant. Statistical analysis: (D,F) Mann-Whitney U tests or (E) unpaired, two-tailed, student's t test. n = 3 animals per group.

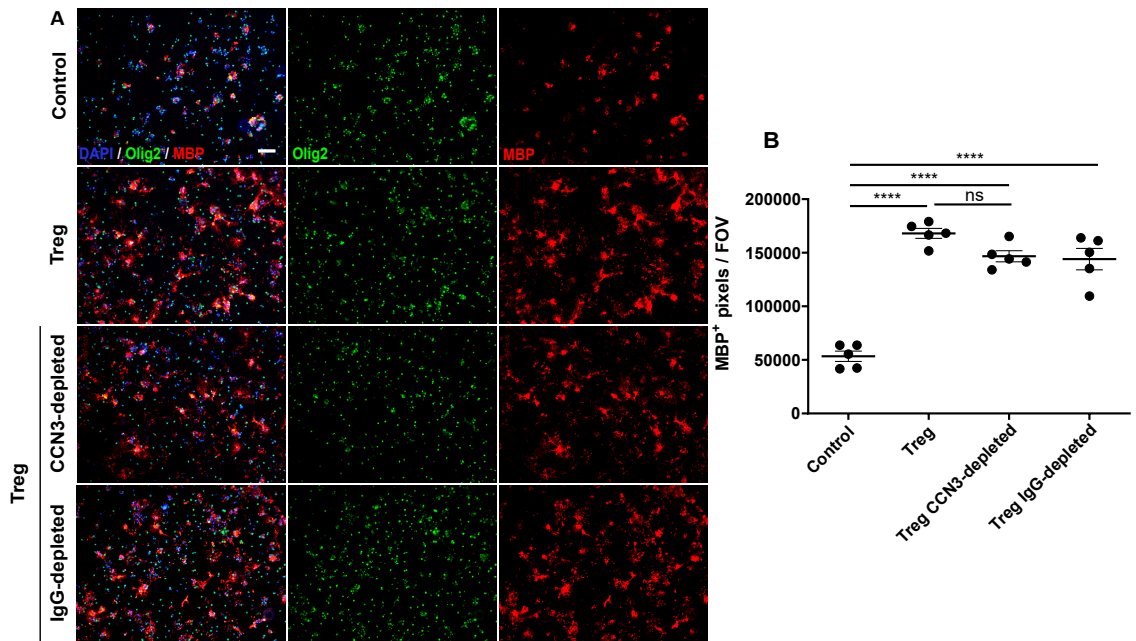

**Supplementary Figure 4. CCN3 does not directly promote OPC differentiation *in vitro*.** (A) Representative images of Olig2 and MBP staining in pure OPC cultures treated with control media, Treg-conditioned medium (CM), CCN3-depleted Treg-CM and isotype control-treated Treg-CM. Scale bar: 100  $\mu$ m. (B) MBP<sup>+</sup> pixels / field of view (FOV) quantification in pure OPC cultures treated as described above. Data are mean  $\pm$  SEM. ns: not significant, \*\*\*\* $p < 0.0001$ . Statistical analysis: one-way ANOVA with Bonferroni's multiple comparison test. Data representative of 2 experiments. n = 5 wells per group.

**Supplementary Table 1. Antibodies used for immunofluorescence staining of CNS frozen sections.**

| <b>Antibody</b>                                        | <b>Primary / Secondary</b> | <b>Dilution</b> | <b>Clone</b> | <b>Supplier</b>         | <b>Catalogue number</b> |
|--------------------------------------------------------|----------------------------|-----------------|--------------|-------------------------|-------------------------|
| goat anti-mouse CCN3<br>(reconstituted at<br>0.2mg/ml) | Primary                    | 1:100           | Polyclonal   | R&D systems             | AF1976                  |
| rabbit anti-mouse Olig2                                | Primary                    | 1:200           | Polyclonal   | Millipore               | AB9610                  |
| mouse anti-mouse APC                                   | Primary                    | 1:100           | CC1          | Abcam                   | ab16794                 |
| rat anti-mouse Ki67                                    | Primary                    | 1:500           | SolA15       | eBioscience             | 14-5698-82              |
| mouse anti-mouse<br>NF200                              | Primary                    | 1:400           | N52          | Millipore               | MAB5266                 |
| chicken anti-mouse NFH                                 | Primary                    | 1:250 -1:400    | Polyclonal   | EncorBiotech            | CPCA-NF-H               |
| rabbit anti-mouse NeuN                                 | Primary                    | 1:500           | EPR12763     | Abcam                   | ab177487                |
| rat anti-mouse MBP                                     | Primary                    | 1:600           | 12           | Millipore               | MAB386                  |
| rabbit anti-mouse dMBP                                 | Primary                    | 1:500           | Polyclonal   | Sigma                   | AB5864                  |
| rabbit anti-mouse Iba1                                 | Primary                    | 1:800           | Polyclonal   | Wako                    | 019-19741               |
| rabbit anti-mouse APP                                  | Primary                    | 1:300           | Y188         | Abcam                   | ab32136                 |
| chicken anti-GFAP                                      | Primary                    | 1:1000          | Polyclonal   | Abcam                   | ab4674                  |
| donkey anti-goat AF488                                 | Secondary                  | 1:200           | Polyclonal   | ThermoFisher Scientific | A-11055                 |
| donkey anti-rabbit<br>AF568                            | Secondary                  | 1:200           | Polyclonal   | ThermoFisher Scientific | A-10042                 |
| donkey anti-rabbit<br>AF594                            | Secondary                  | 1:200           | Polyclonal   | ThermoFisher Scientific | A-21207                 |
| donkey anti-mouse<br>AF594                             | Secondary                  | 1:200           | Polyclonal   | ThermoFisher Scientific | A-21203                 |
| donkey anti-chicken<br>FITC                            | Secondary                  | 1:500           | Polyclonal   | ThermoFisher Scientific | SA1-72000               |
| goat anti-chicken AF488                                | Secondary                  | 1:200           | Polyclonal   | ThermoFisher Scientific | A-11039                 |
| goat anti-rabbit AF488                                 | Secondary                  | 1:200           | Polyclonal   | ThermoFisher Scientific | A-11008                 |
| goat anti-mouse AF647                                  | Secondary                  | 1:200           | Polyclonal   | ThermoFisher Scientific | A-21236                 |
| goat anti-mouse AF594                                  | Secondary                  | 1:200           | Polyclonal   | ThermoFisher Scientific | A-11032                 |
| goat anti-mouse AF568                                  | Secondary                  | 1:200           | Polyclonal   | ThermoFisher Scientific | A-11004                 |
| goat anti-rat AF594                                    | Secondary                  | 1:200           | Polyclonal   | ThermoFisher Scientific | A-11007                 |
